# Supplementary material for: Vegetation Assembly, Adaptive Strategies and Positive Interactions During Primary Succession in the Forefield of the Last Venezuelan Glacier
Source: Frontiers journal article supplement (doi:10.3389/fevo.2021.657755), 2021-10-27
Supplement: Table_1.DOCX [file Table_1.DOCX]

**ANEXES.**

Figure Annex 1. Schematic representation of the 1000 m2 (20x50 m) study area defined in each in each site along the chronosequence, showing the plots, subplots, soil sampling points and thermometer distribution. Vascular plant cover was estimated inside 5x5 m plots, distributed haphazardly inside the study area. Nested 50x50 cm subplots for lichens and briophytes surveys were placed diagonally inside each plot. Soil samples were collected in pairs, inside and outside 6 randomly selected biocrusts. Two thermometer data-loggers, placed 2 cm below the surface inside and outside one of the biocrusts, were set for hourly data recording during 6 months.

Figure Annex 2. Presence-absence diagrams for the species of lichens, bryophytes and vascular-plants in four study sites (S1-S4) along a post-glacial chronosequence (10 to 109 years of succession) at Humboldt Peak, Venezuela. Species are organized to illustrate changes in progressive species accumulation (nestedness) along succession.

Figure Annex 3. Mean relative interaction index (RII) and 95% confidence interval for the cover of each species of lichenized fungy (black circles) and bryophyte (white circles) in paired sampled in rings (n = 40) centered on mature individuals of the pioneer grass Poa petrosa vs. random sites outside, in two study sites (S2-S3) along a post-glacial chronosequence (21 and 67 years) at Humboldt Peak, Venezuela.

Annex Table 1. Mean, maximum and minimum temperatures (Tmean, Tmax, Tmin), average daily temperature amplitudes (Tamp) and percent of days with below zero temperatures (No. days freezing) in superficial soils (at 2 cm depth) below biocrusts (Bio) and in paired areas outside (Out) in four sites (S1 to S4) along a glacier chronosequence (years since glacier retreat) in the forefront of the Humboldt glacier, Venezuela. Temperatures recorded every hour from the 1st of July to 10th of December 2019.

| Variable | S1. 10 years  (4670 m) | | S2. 21 years  (4632 m) | | S3. 67 years  (4537 m) | | S4. 109 years  (4365 m) | |
| --- | --- | --- | --- | --- | --- | --- | --- | --- |
| Bio | Out | Bio | Out | Bio | Out | Bio | Out |
| Tmean (°C) | 3.18 | 3.23 | 2.18 | 3.04 | 4.03 | 4.55 | 5.17 | 5.83 |
| Tmax (°C) | 23.59 | 26.04 | 27.48 | 31.26 | 18.30 | 24.97 | 20.15 | 23.50 |
| Tmin (°C) | -1.53 | -1.70 | -3.93 | -2.98 | -0.40 | -1.36 | -0.20 | -0.26 |
| Tamp(°C) | 10.06 | 10.06 | 9.53 | 11.84 | 10.89 | 13.04 | 11.08 | 11.93 |
| No. days freezing (%) | 33 | 40 | 40 | 51 | 5 | 18 | 2 | 2 |

**Annex Table 2. See additional file included.**
